# Supplementary material
Source: PubMed Central journal article supplement (PMC2739111)
Supplement: NIHMS133057-supplement-01.pdf [file NIHMS133057-supplement-01.pdf]

Type of file: table

Label: 1

Filename: table\_1.docx

Supplemental Table 1. Antibodies against ERCC1-XPF DNA repair nuclease and their suitability for use in a variety of immunodetection applications.

| Antigen | Antibody          | Source             | Origin | Clonality | WB    |         |       | IP    | IF    | Local damage | IHC |
|---------|-------------------|--------------------|--------|-----------|-------|---------|-------|-------|-------|--------------|-----|
|         |                   |                    |        |           | Human | Hamster | Mouse | Human | Human |              |     |
| ERCC1   | FL297             | Santa Cruz         | Rabbit | poly      | +     | -       | -     | +     | +     | +            | +   |
|         | D-10              | Santa Cruz         | Mouse  | mono      | +     | +       | +     | +     | +     | +            | -   |
|         | 3H11 <sup>1</sup> | Cancer Research UK | Mouse  | mono      | +     | -       | -     | +     | -     | -            | -   |
|         | 8F1 <sup>2</sup>  | Neomarkers         | Mouse  | mono      | -     | -       | -     | +     | -     | -            | -   |
|         | RW018             | Cancer Research UK | Rabbit | poly      | +     | -       | -     | +     | -     | -            | -   |
|         | RW017             | Cancer Research UK | Rabbit | poly      | +     | +       | +/-   | +     | -     | -            | -   |
| XPF     | Ab-1              | Neomarkers         | Mouse  | mono      | +     | -       | -     | +     | +     | +            | -   |
|         | 4H4               | Cancer Research UK | Mouse  | mono      | +     | -       | -     | +     | +     | +            | +   |
|         | 3F2               | Cancer Research UK | Mouse  | mono      | +     | -       | -     | +     | +     | +            | +   |
|         | 9A2               | Cancer Research UK | Mouse  | mono      | +     | +/-     | +/-   | +     | -     | -            | -   |
|         | RA-1              | Cancer Research UK | Rabbit | poly      | +     | +       | +/-   | +     | -     | -            | -   |

<sup>1</sup>Available from several commercial vendors including Neomarkers (ERCC1 Ab-1).

<sup>2</sup>Stocks from Cancer Research UK were also tested. Available from several commercial vendors under other names including Neomarkers (ERCC1 Ab-2), Spring Biosciences (SPM243) and Santa Cruz.

Abbreviations: WB = immunoblot; IP = immunoprecipitation; IF = immunofluorescence; Local damage = Co-localization with UV-induced DNA damage; IHC = immunohistochemistry on paraffin embedded material.

Type of file: table

Label: 2

Filename: table\_2.docx

Supplemental Table 2. Optimal concentrations of ERCC1 and XPF antibodies for various applications.

| <b>Antibody</b> | <b>Dilution</b>   |                           |
|-----------------|-------------------|---------------------------|
|                 | <b>Immunoblot</b> | <b>Immunofluorescence</b> |
| <b>FL297</b>    | 1:1000            | 1:200                     |
| <b>D-10</b>     | 1:100             | 1:100                     |
| <b>3H11</b>     | 1:500             | -                         |
| <b>8F1</b>      | 1:100             | -                         |
| <b>RW018</b>    | 1:1500            | -                         |
| <b>RW017</b>    | 1:1500            | -                         |
| <b>Ab-1</b>     | 1:100             | 1:200                     |
| <b>4H4</b>      | 1:500             | 1:400                     |
| <b>3F2</b>      | 1:500             | 1:100                     |
| <b>9A2</b>      | 1:10000           | -                         |
| <b>RA-1</b>     | 1:5000            | -                         |
